# Supplementary material for: An inhibitory role of Arg-84 in anion channelrhodopsin-2 expressed in Escherichia coli
Source: PubMed Central journal article supplement (PMC5288786; doi:10.1038/srep41879), 2017-02-02
Supplement: srep41879-s1.pdf [file srep41879-s1.pdf]

**An inhibitory role of Arg-84 in anion channelrhodopsin-2 expressed in  
*Escherichia coli***

Satoko Doi<sup>1</sup>, Takashi Tsukamoto<sup>1</sup>, Susumu Yoshizawa<sup>2</sup>, & Yuki Sudo<sup>1,\*</sup>

<sup>1</sup>Graduate School of Medicine, Dentistry and Pharmaceutical Sciences, Okayama University, Okayama 700-8530, Japan.

<sup>2</sup>Atmosphere and Ocean Research Institute, The University of Tokyo, Chiba 277-8564 Japan.

\*To whom correspondence should be addressed: Yuki Sudo; Telephone: +81-86-251-7945,

E-mail: [sudo@okayama-u.ac.jp](mailto:sudo@okayama-u.ac.jp)



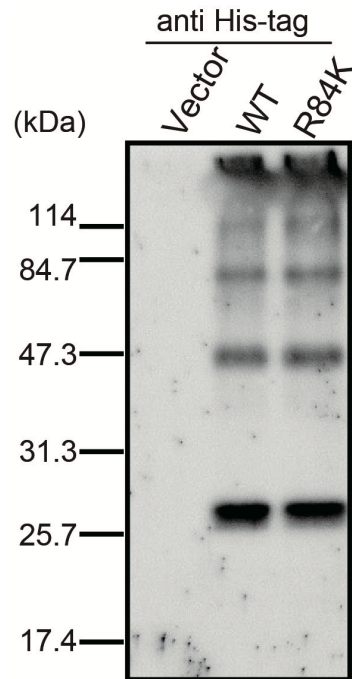

**Figure S2. Western blot analysis for wild-type (WT) and R84K mutant of ACR2.**

The protein was expressed in *E. coli* BL21(DE3) cells with a His-tag at the C-terminus and was detected using an anti His-tag antibody. Cells harboring the pET22b vector plasmid alone were used as a negative control (vector).
